# Supplementary material for: Relationships between Mitochondrial Function, AMPK, and TORC1 Signaling in Lymphoblasts with Premutation Alleles of the FMR1 Gene
Source: MDPI journal article supplement (doi:10.3390/ijms221910393), 2021-09-27

# Supplementary information

## Contents

|                                                                                                                                                                                                      |    |
|------------------------------------------------------------------------------------------------------------------------------------------------------------------------------------------------------|----|
| Supplementary tables and figures .....                                                                                                                                                               | 2  |
| Supplementary Figure S1. Mitochondrial measures that are not significantly altered in lymphoblasts carrying PM alleles of FMR1. ....                                                                 | 2  |
| Supplementary Table S1. Pearson correlations amongst key parameters of mitochondrial activity. ....                                                                                                  | 3  |
| Multiple regressions .....                                                                                                                                                                           | 4  |
| Supplementary regression 1. Basal respiration rates depend on AMPK activity and gender. ....                                                                                                         | 4  |
| Supplementary regression 2. O <sub>2</sub> consumption by ATP synthesis at Complex V depends on AMPK activity and gender. ....                                                                       | 5  |
| Supplementary regression 3. The “proton leak” in PM lymphoblasts is elevated, but not significantly related to the gender, age, CGG expansion size, AMPK or TORC1 activity in the participants. .... | 6  |
| Supplementary regression 4. Elevated “nonmitochondrial” O <sub>2</sub> consumption in PM lymphoblasts can be explained by decreased TORC1 activity. ....                                             | 7  |
| Supplementary regression 5. AMPK activity in PM lymphoblasts can be explained by decreased TORC1 activity as well as a TORC1-independent component. ....                                             | 8  |
| Supplementary regression 6. TORC1 activity is reduced in PM lymphoblasts, but is also positively correlated with expansion size within both the control and PM groups. ....                          | 9  |
| Supplementary regression 7. The elevated ATP steady state levels in PM cells depend on AMPK activity. ....                                                                                           | 10 |
| Supplementary regression 8. Reactive O <sub>2</sub> species levels are reduced in PM cells, dependent on the CGG expansion size. ....                                                                | 11 |
| Lasso regressions. ....                                                                                                                                                                              | 12 |
| Supplementary lasso regression 1. Basal OCR dependence on AMPK, TORC1, CGG, genetic group, age and gender. ....                                                                                      | 12 |
| Supplementary lasso regression 2. ATP synthesis OCR dependence on AMPK, TORC1, CGG, genetic group, age and gender. ....                                                                              | 13 |
| Supplementary lasso regression 3. Proton leak dependence on AMPK, TORC1, CGG, genetic group, age and gender ....                                                                                     | 13 |
| Supplementary lasso regression 4. Nonmitochondrial OCR dependence on AMPK, CGG, TORC1, genetic group, age and gender. ....                                                                           | 14 |
| Supplementary lasso regression 5. AMPK activity dependence on TORC1, CGG expansion size, ATP steady state levels, genetic group, age and gender. ....                                                | 14 |
| Supplementary lasso regression 6. TORC1 activity dependence on AMPK, CGG, ATP levels, genetic group, age and gender ....                                                                             | 15 |
| Supplementary lasso regression 7. Lasso multivariate regression of AMPK and TORC1 activities against CGG expansion size. ....                                                                        | 16 |
| Supplementary lasso regression 8. ATP steady state level dependence on AMPK, TORC1, CGG, ATP synthesis OCR, nonmitochondrial OCR, basal OCR, genetic group, age and gender. ....                     | 17 |
| Supplementary lasso regression 9. ROS dependence on AMPK, TORC1, CGG, basal OCR, genetic group, age and gender. ....                                                                                 | 17 |

## Supplementary tables and figures

### Supplementary Figure S1. Mitochondrial measures that are not significantly altered in lymphoblasts carrying PM alleles of FMR1.

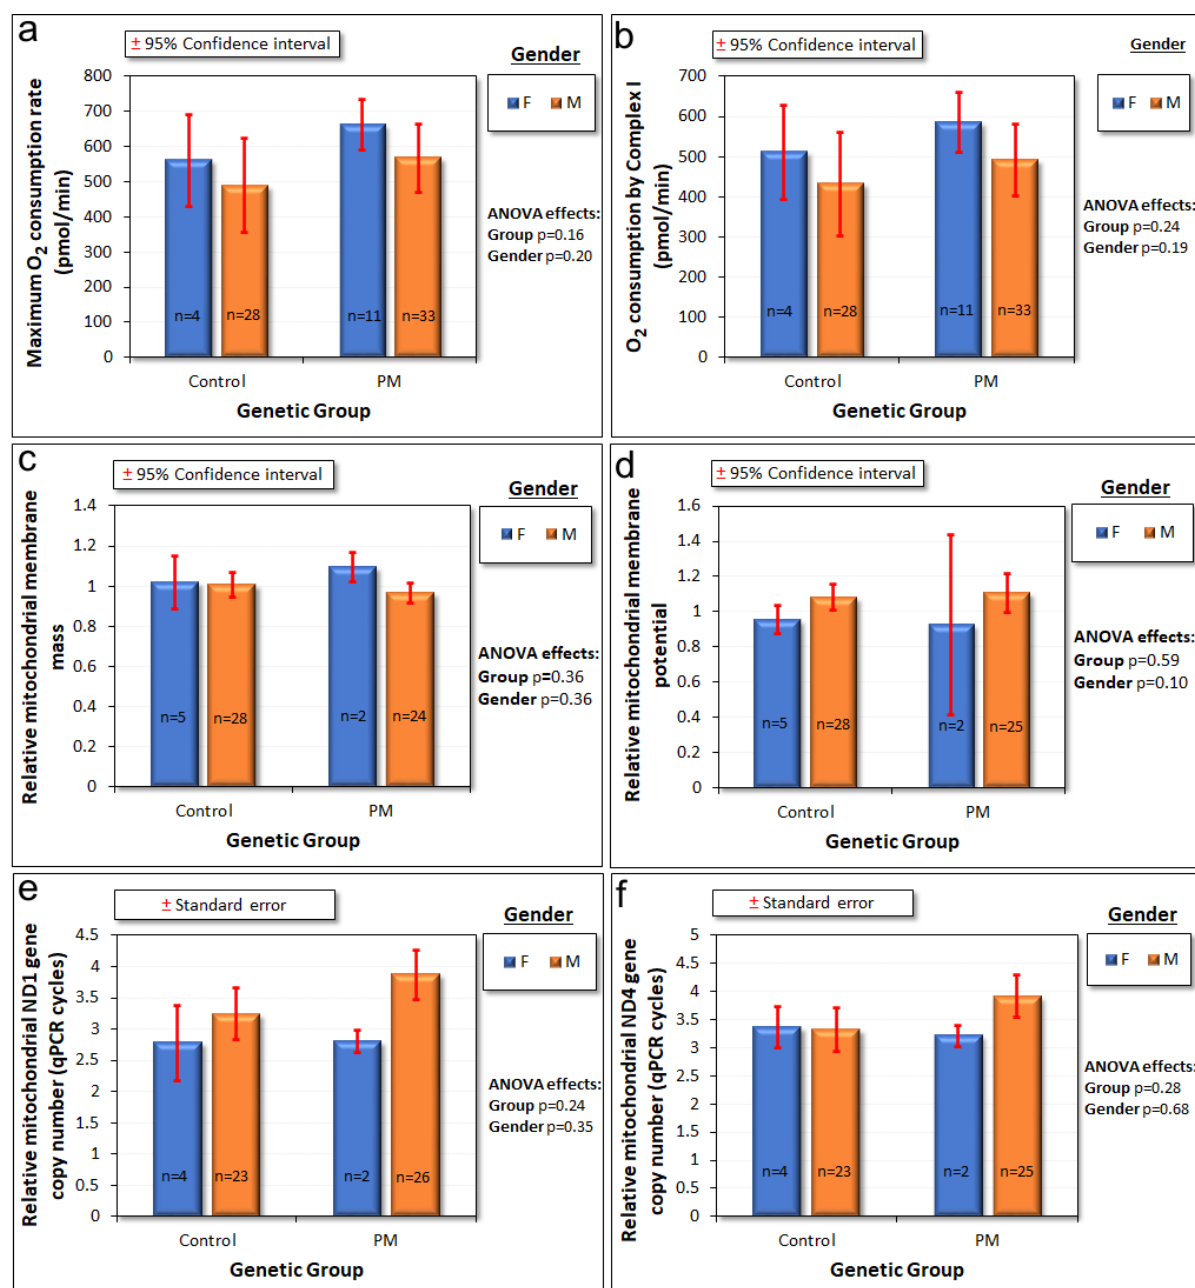

**Supplementary Figure S1. Mitochondrial measures that are not significantly altered in lymphoblasts carrying PM alleles of FMR1.** Statistical significances shown were derived from 2-way ANOVA using the average of multiple, independent assays for each of the indicated number of lymphoblast cell lines. Identical conclusions concerning the effect of the PM allele were obtained using 2-sample t and Mann-Whitney U tests on pooled data from males and females. The maximum uncoupled electron transport rate (a) and its major contributor, complex I (b) showed the same trend as other parameters of mitochondrial activity (Results Figure 3) but this did not reach statistical significance. To facilitate comparisons across all measures of mitochondrial function, the results for both males and females are shown, but particularly for panels c-f the female sample sizes were too small to allow detection of anything but large effects of gender. The analysis of variance showed no significant effect of either genetic group and gender on any of these measures.

## Supplementary Table S1. Pearson correlations amongst key parameters of mitochondrial activity.

| Pearson correlations amongst mitochondrial respiratory activities and ATP levels |                         | Premutation lymphoblasts |                      |             |               |                        |                   |                         |
|----------------------------------------------------------------------------------|-------------------------|--------------------------|----------------------|-------------|---------------|------------------------|-------------------|-------------------------|
|                                                                                  |                         | Basal OCR                | OCR by ATP synthesis | Maximum OCR | Complex I OCR | "Nonmitochondrial" OCR | "Proton leak" OCR | ATP steady state levels |
| Control lymphoblasts                                                             | Basal OCR               |                          |                      |             |               |                        |                   |                         |
|                                                                                  | Correlation coefficient |                          | 0.933                | 0.741       | 0.757         | 0.678                  | 0.549             | 0.394                   |
|                                                                                  | Valid cases             |                          | 44                   | 44          | 44            | 44                     | 44                | 43                      |
|                                                                                  | One-sided significance  |                          | 1.56E-20             | 4.39E-09    | 1.42E-09      | 2.12E-07               | 5.71E-05          | 4.47E-03                |
|                                                                                  | OCR by ATP synthesis    |                          |                      |             |               |                        |                   |                         |
|                                                                                  | Correlation coefficient | 0.967                    |                      | 0.674       | 0.699         | 0.469                  | 0.326             | 0.301                   |
|                                                                                  | Valid cases             | 33                       |                      | 44          | 44            | 44                     | 44                | 43                      |
|                                                                                  | One-sided significance  | 3.32E-20                 |                      | 2.63E-07    | 6.60E-08      | 6.57E-04               | 1.53E-02          | 2.49E-02                |
|                                                                                  | Maximum OCR             |                          |                      |             |               |                        |                   |                         |
|                                                                                  | Correlation coefficient | 0.872                    | 0.789                |             | 0.986         | 0.655                  | 0.282             | 0.272                   |
|                                                                                  | Valid cases             | 33                       | 33                   |             | 44            | 44                     | 44                | 43                      |
|                                                                                  | One-sided significance  | 2.05E-11                 | 2.47E-08             |             | 1.62E-34      | 6.99E-07               | 3.19E-02          | 3.90E-02                |
|                                                                                  | Complex I OCR           |                          |                      |             |               |                        |                   |                         |
|                                                                                  | Correlation coefficient | 0.862                    | 0.788                | 0.998       |               | 0.618                  | 0.273             | 0.312                   |
|                                                                                  | Valid cases             | 33                       | 33                   | 33          |               | 44                     | 44                | 43                      |
|                                                                                  | One-sided significance  | 5.70E-11                 | 2.57E-08             | 4.56E-38    |               | 3.83E-06               | 3.64E-02          | 2.10E-02                |
|                                                                                  | "Nonmitochondrial" OCR  |                          |                      |             |               |                        |                   |                         |
|                                                                                  | Correlation coefficient | 0.762                    | 0.661                | 0.767       | 0.731         |                        | 0.430             | 0.250                   |
|                                                                                  | Valid cases             | 33                       | 33                   | 33          | 33            |                        | 44                | 43                      |
|                                                                                  | One-sided significance  | 1.29E-07                 | 1.39E-05             | 9.88E-08    | 6.91E-07      |                        | 1.78E-03          | 5.29E-02                |
|                                                                                  | "Proton leak" OCR       |                          |                      |             |               |                        |                   |                         |
|                                                                                  | Correlation coefficient | 0.754                    | 0.630                | 0.712       | 0.698         | 0.549                  |                   | 0.372                   |
|                                                                                  | Valid cases             | 32                       | 32                   | 32          | 32            | 32                     |                   | 43                      |
|                                                                                  | One-sided significance  | 3.09E-07                 | 5.50E-05             | 2.42E-06    | 4.39E-06      | 5.63E-04               |                   | 7.00E-03                |
|                                                                                  | ATP steady state levels |                          |                      |             |               |                        |                   |                         |
|                                                                                  | Correlation coefficient | -0.073                   | -0.093               | 0.103       | 0.121         | -0.022                 | -0.070            |                         |
|                                                                                  | Valid cases             | 33                       | 33                   | 33          | 33            | 33                     | 32                |                         |
|                                                                                  | One-sided significance  | 3.44E-01                 | 3.03E-01             | 2.84E-01    | 2.52E-01      | 4.53E-01               | 3.52E-01          |                         |

**Supplementary Table S1. Pearson correlations amongst key parameters of mitochondrial activity.**

Pearson correlations amongst components of the mitochondrial respiratory activities and ATP steady state levels in control and PM lymphoblasts are shown. Significant correlations ( $p < 0.05$ ) are highlighted in red, correlations suggesting a trend that did not reach statistical significance ( $0.05 < p < 0.1$ ) are highlighted in amber, while insignificant correlations ( $p > 0.1$ ) are highlighted in green. OCR=O<sub>2</sub> consumption rate in pmol/min. Similar results were obtained using the Spearman rank correlation coefficient.

## Multiple regressions

Multiple regressions involved the indicated variables with stepwise, backward removal of variables with insignificant regression coefficients ( $p < 0.05$ ). Dummy variables were included to allow intercepts to differ from the controls in the PM group ("Genetic Group code"), the female cohort compared to the male cohort ("Gender code") and the female cohort in the PM group compared to the other groups ("Gender.PM"). Variables whose names contain "PM", "PM.slope" or "PM.Slope" are dummy variables providing additional slope terms for the indicated variables, thereby allowing the slopes for the those variables to differ in the PM group from controls.

### Supplementary regression 1. Basal respiration rates depend on AMPK activity and gender.

#### Multiple Regression

**X-Variables:** Genetic Group Code  
Log(CGG)  
Log(CGG).PM.slope  
Patient.age  
Patient.age PM.Dummy.slope  
Log(AMPK)  
log AMPK.PM.Slope  
Log(TORC1 activity) (minus outliers and 1.2.19 expt)  
LogTORC1.PM.slope  
Gender code  
Gender.PM

**Y-Variable:** Basal.average..pmol.min.

**Method:** Backward

| Steps                         | P           | R-Square    | Corrected   |
|-------------------------------|-------------|-------------|-------------|
| Gender.PM (-)                 | 0.968915399 | 0.26173919  | 0.062209241 |
| Patient.age (-)               | 0.949756441 | 0.261658882 | 0.086788618 |
| LogTORC1.PM.slope (-)         | 0.948719862 | 0.261577444 | 0.110106151 |
| log AMPK.PM.Slope (-)         | 0.803166677 | 0.26038502  | 0.130952398 |
| Log(CGG) (-)                  | 0.577793204 | 0.254561601 | 0.145473055 |
| Log(CGG).PM.slope (-)         | 0.425492816 | 0.242781089 | 0.15263598  |
| Log(TORC1 activity) (minus ou | 0.506969361 | 0.234704858 | 0.163514612 |
| Genetic Group Code (-)        | 0.270645012 | 0.212541128 | 0.15885075  |
| Patient.age PM.Dummy.slope    | 0.465010686 | 0.202819111 | 0.16738885  |

#### Summary

|           | N  | R           | R-Square    | Std.Error   |
|-----------|----|-------------|-------------|-------------|
| normal    | 48 | 0.450354429 | 0.202819111 | 127.4400952 |
| corrected |    | 0.409131824 | 0.16738885  |             |

#### Equation

|             | Coefficient | Conf. (±)   | Std.Error   | T           | P           |
|-------------|-------------|-------------|-------------|-------------|-------------|
| Constant    | 362.7274685 | 43.28469317 | 21.4908001  | 16.8782673  | 4.34224E-21 |
| Log(AMPK)   | 243.0356072 | 205.2491552 | 101.9059682 | 2.384900625 | 0.021357354 |
| Gender code | 100.8179791 | 88.22008945 | 43.80117237 | 2.301718737 | 0.026034533 |

#### Analysis of variance

|            | Sum of Squares | Degrees of Freedom | Mean Square | F           | P           |
|------------|----------------|--------------------|-------------|-------------|-------------|
| Regression | 185941.6519    | 2                  | 92970.82596 | 5.724459868 | 0.006095787 |
| Residue    | 730844.0035    | 45                 | 16240.97786 |             |             |
| Total      | 916785.6555    | 47                 | 19506.07778 |             |             |

## Supplementary regression 2. O<sub>2</sub> consumption by ATP synthesis at Complex V depends on AMPK activity and gender.

### Multiple Regression

**X-Variables:** Genetic Group Code  
 Log(CGG)  
 Log(CGG).PM.slope  
 Patient.age  
 Patient.age PM.Dummy.slope  
 Log(AMPK)  
 log AMPK.PM.Slope  
 Log(TORC1 activity) (minus outliers and 1.2.19 expt)  
 LogTORC1.PM.slope  
 Gender code  
 Gender.PM

**Y-Variable:** ATP.average..pmol.min.

**Method:** Backward

| Steps                                                | P           | R-Square    | Corrected   |
|------------------------------------------------------|-------------|-------------|-------------|
| log AMPK.PM.Slope (-)                                | 0.913609071 | 0.301101776 | 0.112210363 |
| Log(TORC1 activity) (minus outliers and 1.2.19 expt) | 0.9055022   | 0.300831899 | 0.135239454 |
| Log(CGG) (-)                                         | 0.884092135 | 0.300435573 | 0.156935177 |
| Gender.PM (-)                                        | 0.797721205 | 0.299241066 | 0.176608253 |
| Patient.age PM.Dummy.slope                           | 0.706020626 | 0.2967125   | 0.193792378 |
| Log(CGG).PM.slope (-)                                | 0.619474384 | 0.29241743  | 0.20818141  |
| Genetic Group Code (-)                               | 0.803012313 | 0.291355755 | 0.225435361 |
| LogTORC1.PM.slope (-)                                | 0.730643164 | 0.289376908 | 0.240925333 |
| Patient.age (-)                                      | 0.153564282 | 0.255321408 | 0.222224582 |

### Summary

|                  | N  | R           | R-Square    | Std.Error   |
|------------------|----|-------------|-------------|-------------|
| <b>normal</b>    | 48 | 0.505293388 | 0.255321408 | 89.75395554 |
| <b>corrected</b> |    | 0.471407023 | 0.222224582 |             |

### Equation

|             | Coefficient | Conf. (±)   | Std.Error   | T           | P           |
|-------------|-------------|-------------|-------------|-------------|-------------|
| Constant    | 234.5419972 | 30.48469496 | 15.13561579 | 15.4960327  | 1.16794E-19 |
| Log(AMPK)   | 165.2566373 | 144.5535922 | 71.77069135 | 2.302564379 | 0.025982705 |
| Gender code | 95.21232416 | 62.13195287 | 30.84844273 | 3.0864548   | 0.003461083 |

### Analysis of variance

|                   | Sum of Squares | Degrees of Freedom | Mean Square | F           | P           |
|-------------------|----------------|--------------------|-------------|-------------|-------------|
| <b>Regression</b> | 124290.5388    | 2                  | 62145.2694  | 7.714377376 | 0.001316132 |
| <b>Residue</b>    | 362509.7641    | 45                 | 8055.772536 |             |             |
| <b>Total</b>      | 486800.3029    | 47                 | 10357.45325 |             |             |

## Supplementary regression 3. The “proton leak” in PM lymphoblasts is elevated, but not significantly related to the gender, age, CGG expansion size, AMPK or TORC1 activity in the participants.

### Multiple Regression

**X-Variables:** Genetic Group Code  
 Log(CGG)  
 Log(CGG).PM.slope  
 Patient.age  
 Patient.age PM.Dummy.slope  
 Log(AMPK)  
 log AMPK.PM.Slope  
 Log(TORC1 activity) (minus outliers and 1.2.19 expt)  
 LogTORC1.PM.slope  
 Gender code  
 Gender.PM

**Y-Variable:** Proton.leak.average..pmol.min.

**Method:** Backward

| Steps                                                | P           | R-Square    | Corrected   |
|------------------------------------------------------|-------------|-------------|-------------|
| Log(TORC1 activity) (minus outliers and 1.2.19 expt) | 0.998185921 | 0.191302996 | 0           |
| Patient.age (-)                                      | 0.86423079  | 0.190719012 | 0.017301657 |
| log AMPK.PM.Slope (-)                                | 0.838617644 | 0.189909811 | 0.039195357 |
| Gender.PM (-)                                        | 0.789528515 | 0.188550717 | 0.059456513 |
| Patient.age PM.Dummy.slope                           | 0.669179745 | 0.185138267 | 0.076490036 |
| Log(CGG).PM.slope (-)                                | 0.619026468 | 0.180598675 | 0.091533314 |
| Log(AMPK) (-)                                        | 0.48826096  | 0.171902812 | 0.101426456 |
| LogTORC1.PM.slope (-)                                | 0.130222929 | 0.130107636 | 0.075739363 |
| Log(CGG) (-)                                         | 0.149936662 | 0.091308825 | 0.054219389 |
| Gender code (-)                                      | 0.181105154 | 0.057176485 | 0.038320015 |

### Summary

|           | N  | R           | R-Square    | Std.Error   |
|-----------|----|-------------|-------------|-------------|
| normal    | 52 | 0.23911605  | 0.057176485 | 51.08094236 |
| corrected |    | 0.195754988 | 0.038320015 |             |

### Equation

|                    | Coefficient | Conf. (±)   | Std.Error   | T           | P           |
|--------------------|-------------|-------------|-------------|-------------|-------------|
| Constant           | 52.62646347 | 20.5198184  | 10.21618847 | 5.151281577 | 4.39937E-06 |
| Genetic Group Code | 24.68807419 | 28.47693886 | 14.17779479 | 1.741319758 | 0.087777725 |

### Analysis of variance

|            | Sum of Squares | Degrees of Freedom | Mean Square | F           | P           |
|------------|----------------|--------------------|-------------|-------------|-------------|
| Regression | 7911.791923    | 1                  | 7911.791923 | 3.032194499 | 0.087777725 |
| Residue    | 130463.1336    | 50                 | 2609.262672 |             |             |
| Total      | 138374.9255    | 51                 | 2713.233834 |             |             |

## Supplementary regression 4. Elevated “nonmitochondrial” O<sub>2</sub> consumption in PM lymphoblasts can be explained by decreased TORC1 activity.

### Multiple Regression

**X-Variables:** Genetic Group Code  
 Log(CGG)  
 Log(CGG).PM.slope  
 Patient.age  
 Patient.age PM.Dummy.slope  
 Log(AMPK)  
 log AMPK.PM.Slope  
 Log(ATP.steady.state)  
 Log(ATPsteady).PM.slope  
 Log(TORC1 activity) (minus outliers and 1.2.19 expt)  
 LogTORC1.PM.slope  
 Gender code  
 Gender.PM

**Y-Variable:** Nonrespiratory.average..pmol.min.

**Method:** Backward

| Steps                       | P           | R-Square    | Corrected   |
|-----------------------------|-------------|-------------|-------------|
| Gender code (-)             | 0.855199062 | 0.301367541 | 0.080746764 |
| Patient.age PM.Dummy.slope  | 0.659240509 | 0.297735882 | 0.099661387 |
| Log(ATP.steady.state) (-)   | 0.502857936 | 0.28950055  | 0.111875688 |
| log AMPK.PM.Slope (-)       | 0.528899994 | 0.28233323  | 0.124796622 |
| Log(AMPK) (-)               | 0.660572561 | 0.278908402 | 0.141557621 |
| Log(CGG) (-)                | 0.376923973 | 0.265215874 | 0.145599853 |
| Genetic Group Code (-)      | 0.669651102 | 0.262062571 | 0.16143474  |
| Patient.age (-)             | 0.337626288 | 0.246300766 | 0.162556407 |
| Log(CGG).PM.slope (-)       | 0.356206991 | 0.231745991 | 0.164941295 |
| Log(ATPsteady).PM.slope (-) | 0.097382494 | 0.183924597 | 0.131834678 |
| LogTORC1.PM.slope (-)       | 0.065444714 | 0.122145183 | 0.085567899 |
| Gender.PM (-)               | 0.128107248 | 0.078300334 | 0.059490137 |

### Summary

|                  | N  | R           | R-Square    | Std.Error   |
|------------------|----|-------------|-------------|-------------|
| <b>normal</b>    | 51 | 0.279821969 | 0.078300334 | 31.05311176 |
| <b>corrected</b> |    | 0.243906    | 0.059490137 |             |

### Equation

|                     | Coefficient  | Conf. (±)   | Std.Error   | T            | P           |
|---------------------|--------------|-------------|-------------|--------------|-------------|
| Constant            | 72.16326618  | 16.25259456 | 8.087577122 | 8.922729897  | 7.68824E-12 |
| Log(TORC1 activity) | -53.85338075 | 53.04349182 | 26.39537518 | -2.040258204 | 0.046732988 |

### Analysis of variance

|                   | Sum of Squares | Degrees of Freedom | Mean Square | F           | P           |
|-------------------|----------------|--------------------|-------------|-------------|-------------|
| <b>Regression</b> | 4014.029117    | 1                  | 4014.029117 | 4.162653539 | 0.046732988 |
| <b>Residue</b>    | 47250.49176    | 49                 | 964.2957501 |             |             |
| <b>Total</b>      | 51264.52087    | 50                 | 1025.290417 |             |             |

## Supplementary regression 5. AMPK activity in PM lymphoblasts can be explained by decreased TORC1 activity as well as a TORC1-independent component.

### Multiple Regression

**X-Variables:** Genetic Group Code  
 Log(CGG)  
 Log(CGG).PM.slope  
 Patient.age  
 Patient.age PM.Dummy.slope  
 Log(ATP.steady.state)  
 Log(ATPsteady).PM.slope  
 Log(TORC1 activity) (minus outliers and 1.2.19 expt)  
 LogTORC1.PM.slope  
 Gender code

**Y-Variable:** AMPK (minus outliers)

**Method:** Backward

| Steps                       | P           | R-Square    | Corrected   |
|-----------------------------|-------------|-------------|-------------|
| Log(CGG) (-)                | 0.925374914 | 0.391105932 | 0.250591916 |
| Patient.age PM.Dummy.slope  | 0.890911862 | 0.390808392 | 0.26897007  |
| Gender code (-)             | 0.555627209 | 0.385428498 | 0.280501656 |
| Log(CGG).PM.slope (-)       | 0.50072605  | 0.378510328 | 0.28972609  |
| LogTORC1.PM.slope (-)       | 0.326830149 | 0.363945822 | 0.289986034 |
| Patient.age (-)             | 0.227354075 | 0.341759387 | 0.281919331 |
| Log(ATP.steady.state) (-)   | 0.133789482 | 0.306852979 | 0.260643178 |
| Log(ATPsteady).PM.slope (-) | 0.33360599  | 0.292138651 | 0.261362071 |

### Summary

|           | N  | R           | R-Square    | Std.Error   |
|-----------|----|-------------|-------------|-------------|
| normal    | 49 | 0.540498521 | 0.292138651 | 0.440097554 |
| corrected |    | 0.511235827 | 0.261362071 |             |

### Equation

|                    | Coefficient  | 95%<br>Conf. (±) | Std.Error   | T            | P           |
|--------------------|--------------|------------------|-------------|--------------|-------------|
| Constant           | 0.809708564  | 0.234022342      | 0.116261537 | 6.964543751  | 1.02994E-08 |
| Genetic Group Code | 0.361824015  | 0.279178205      | 0.138694823 | 2.608778093  | 0.012216468 |
| Log TORC1 activity | -0.843425162 | 0.822227208      | 0.408479799 | -2.064790386 | 0.044606317 |

### Analysis of variance

|            | Sum of<br>Squares | Degrees of<br>Freedom | Mean Square | F           | P           |
|------------|-------------------|-----------------------|-------------|-------------|-------------|
| Regression | 3.677024817       | 2                     | 1.838512408 | 9.492238827 | 0.000353841 |
| Residue    | 8.909549404       | 46                    | 0.193685857 |             |             |
| Total      | 12.58657422       | 48                    | 0.262220296 |             |             |

## Supplementary regression 6. TORC1 activity is reduced in PM lymphoblasts, but is also positively correlated with expansion size within both the control and PM groups.

### Multiple Regression

**X-Variables:** Genetic Group Code  
 Log(CGG)  
 Log(CGG).PM.slope  
 Patient.age  
 Log(AMPK)  
 log AMPK.PM.Slope  
 Log(ATP.steady.state)  
 Log(ATPsteady).PM.slope  
 Gender code  
 Gender.PM

**Y-Variable:** Log(TORC1 activity)

**Method:** Backward

| Steps                       | P           | R-Square    | Corrected   |
|-----------------------------|-------------|-------------|-------------|
| Gender code (-)             | 0.865073782 | 0.383587775 | 0.2413388   |
| Log(CGG) (-)                | 0.768201335 | 0.382195558 | 0.25863467  |
| Gender.PM (-)               | 0.498256663 | 0.374980886 | 0.268270306 |
| log AMPK.PM.Slope (-)       | 0.348502292 | 0.361270272 | 0.270023167 |
| Log(ATP.steady.state) (-)   | 0.260662541 | 0.341499128 | 0.264929259 |
| Log(ATPsteady).PM.slope (-) | 0.106028654 | 0.299757281 | 0.236098852 |
| Log(AMPK) (-)               | 0.061899037 | 0.241344394 | 0.190767354 |
| Patient.age (-)             | 0.108540435 | 0.196148892 | 0.161198844 |

### Summary

|           | N  | R           | R-Square    | Std.Error   |
|-----------|----|-------------|-------------|-------------|
| normal    | 49 | 0.442886997 | 0.196148892 | 0.143734084 |
| corrected |    | 0.401495758 | 0.161198844 |             |

### Equation

|                    | Coefficient  | Conf. (±)   | Std.Error   | T            | P           |
|--------------------|--------------|-------------|-------------|--------------|-------------|
| Constant           | -0.194068235 | 0.057864342 | 0.028746817 | -6.750946944 | 2.15547E-08 |
| Genetic Group Code | -1.430947476 | 1.294391866 | 0.643049663 | -2.225251885 | 0.031007842 |
| Log(CGG).PM.slope  | 0.698363411  | 0.68215382  | 0.338891796 | 2.060726813  | 0.045009582 |

### Analysis of variance

|            | Sum of Squares | Degrees of Freedom | Mean Square | F           | P           |
|------------|----------------|--------------------|-------------|-------------|-------------|
| Regression | 0.231892983    | 2                  | 0.115946492 | 5.612263858 | 0.006592333 |
| Residue    | 0.950336397    | 46                 | 0.020659487 |             |             |
| Total      | 1.182229381    | 48                 | 0.024629779 |             |             |

## Supplementary regression 7. The elevated ATP steady state levels in PM cells depend on AMPK activity.

### Multiple Regression

**X-Variables:** Genetic Group Code  
Log(CGG)  
Log(CGG).PM.slope  
Log(AMPK)  
log AMPK.PM.Slope  
Log(Basal)  
log(Basal).PM.slope  
log(ATP.average)  
log(ATP.average).dummy.slope  
Log(Nonrespiratory.average)  
Log(Nonrespiratory.average).PM.slope  
Log(TORC1 activity)  
LogTORC1.PM.slope  
Gender code  
Gender.PM

**Y-Variable:** ATP.average..nM.10.6cells.normalised.to.C101.

**Method:** Backward

| Steps                                    | P           | R-Square    | Corrected   |
|------------------------------------------|-------------|-------------|-------------|
| Log(Basal) (-)                           | 0.969550463 | 0.462391891 | 0.241023846 |
| Log(CGG).PM.slope (-)                    | 0.958539094 | 0.462348522 | 0.262649402 |
| Genetic Group Code (-)                   | 0.959123451 | 0.462307587 | 0.283076782 |
| Log(Nonrespiratory.average) (-)          | 0.920821658 | 0.462157934 | 0.302258941 |
| log(ATP.average) (-)                     | 0.89417475  | 0.461897148 | 0.320291135 |
| Gender code (-)                          | 0.590689739 | 0.457730674 | 0.332591599 |
| Log(CGG) (-)                             | 0.519269973 | 0.4518495   | 0.3422194   |
| Log(Nonrespiratory.average).PM.slope (-) | 0.367632883 | 0.4404707   | 0.344941308 |
| log(Basal).PM.slope (-)                  | 0.313882732 | 0.426282581 | 0.344322949 |
| Log(TORC1 activity) (-)                  | 0.159109738 | 0.398211338 | 0.328235912 |
| Log(AMPK) (-)                            | 0.308449736 | 0.383344104 | 0.327284477 |
| LogTORC1.PM.slope (-)                    | 0.149138807 | 0.35312974  | 0.310005056 |
| Gender.PM (-)                            | 0.051325402 | 0.295510529 | 0.264880552 |
| log(ATP.average).dummy.slope (-)         | 0.083565351 | 0.247597729 | 0.23158917  |

### Summary

|           | N  | R           | R-Square    | Std.Error  |
|-----------|----|-------------|-------------|------------|
| normal    | 49 | 0.49759193  | 0.247597729 | 0.43474265 |
| corrected |    | 0.481237125 | 0.23158917  |            |

### Equation

|                   | Coefficient | 95%<br>Conf. (±) | Std.Error   | T           | P           |
|-------------------|-------------|------------------|-------------|-------------|-------------|
| Constant          | 0.959287979 | 0.140056316      | 0.069619474 | 13.77901794 | 4.00985E-18 |
| log AMPK.PM.Slope | 1.842399161 | 0.942450347      | 0.468475106 | 3.932757869 | 0.000275115 |

### Analysis of variance

|            | Sum of Squares | Degrees of Freedom | Mean Square | F           | P           |
|------------|----------------|--------------------|-------------|-------------|-------------|
| Regression | 2.923202584    | 1                  | 2.923202584 | 15.46658446 | 0.000275115 |
| Residue    | 8.883055068    | 47                 | 0.189001172 |             |             |
| Total      | 11.80625765    | 48                 | 0.245963701 |             |             |

## Supplementary regression 8. Reactive O<sub>2</sub> species levels are reduced in PM cells, dependent on the CGG expansion size.

### Multiple Regression

**X-Variables:** Log(CGG)

Log(CGG).PM.slope

Patient.age

Patient.age PM.Dummy.slope

Log(AMPK)

log AMPK.PM.Slope

Log(Basal)

log(Basal).PM.slope

Log(TORC1 activity) (minus outliers and 1.2.19 expt)

LogTORC1.PM.slope

Gender code

Gender.PM

**Y-Variable:** ROS.average..Fluorescence.relative.to.C105.

**Method:** Backward

| Steps                      | P           | R-Square    | Corrected   |
|----------------------------|-------------|-------------|-------------|
| Log(TORC1 activity) (minus | 0.976545539 | 0.438880344 | 0.114021596 |
| log(Basal).PM.slope (-)    | 0.973829383 | 0.438847713 | 0.158271569 |
| Gender code (-)            | 0.96897564  | 0.438804195 | 0.198291707 |
| log AMPK.PM.Slope (-)      | 0.944968472 | 0.438673784 | 0.23455516  |
| Log(Basal) (-)             | 0.915797852 | 0.438381937 | 0.2674547   |
| Patient.age PM.Dummy.slo   | 0.840468814 | 0.437369887 | 0.296712358 |
| LogTORC1.PM.slope (-)      | 0.865350679 | 0.436681228 | 0.324017473 |
| Patient.age (-)            | 0.846256981 | 0.435816321 | 0.349018831 |
| Log(AMPK) (-)              | 0.813991416 | 0.434590472 | 0.371767191 |
| Log(CGG) (-)               | 0.528746269 | 0.426062282 | 0.385066731 |
| Gender.PM (-)              | 0.094764424 | 0.364762925 | 0.342858198 |

### Summary

|           | N  | R           | R-Square    | Std.Error   |
|-----------|----|-------------|-------------|-------------|
| normal    | 31 | 0.603956062 | 0.364762925 | 0.255591679 |
| corrected |    | 0.585540945 | 0.342858198 |             |

### Equation

|                   | Coefficient  | Conf. (±)   | Std.Error   | T           | P           |
|-------------------|--------------|-------------|-------------|-------------|-------------|
| Constant          | 1.079679619  | 0.111374187 | 0.054455589 | 19.82679159 | 2.07802E-18 |
| Log(CGG).PM.slope | -0.219579773 | 0.110052013 | 0.053809122 | -4.08071651 | 0.000321186 |

### Analysis of variance

|            | Sum of Squares | Degrees of Freedom | Mean Square | F           | P           |
|------------|----------------|--------------------|-------------|-------------|-------------|
| Regression | 1.087843128    | 1                  | 1.087843128 | 16.65224724 | 0.000321186 |
| Residue    | 1.894486087    | 29                 | 0.065327106 |             |             |
| Total      | 2.982329214    | 30                 | 0.099410974 |             |             |

## Lasso regressions.

Lasso regression is a machine learning regression method that combines variable (regression coefficient) selection with determination of the best-fitting regression for a set of dependent (Y) variables (typically one) and independent (explanatory X) variables. It numerically finds the regression coefficients that minimize both the regression errors and the number of explanatory variables in a regression model. In each lasso regression (see below), a regression penalty ( $\lambda$ ) is applied to the regression coefficients, reducing them and their influence on the outcome. As a result, lasso regression tends to underestimate individual regression coefficients, but it is less sensitive than ordinary least squares regression to the effect of individual outliers. The regression penalties were applied over an automatically determined range of values for  $\lambda$  to find the value at which the regression error is minimized. The plot of Mean Squared Error versus  $\text{Log}(\lambda)$  shows on the X axis the logarithm of 2000 values of the lasso regression penalty applied to regression coefficients and on the Y axis the mean squared error for the regression using those coefficients. At each successive value of  $\lambda$ , the data was subdivided randomly into 5 equal subsets ("folds") and each subset was, in turn, put aside as a test set for cross validation, while the other 4 fractions (80% of the data) were used as the training set. For each of the 5 test sets in turn, the algorithm used a numerical minimization method to determine the combination of coefficient values producing the smallest error. The results for all 5 "folds" were combined to determine the best set of coefficients when using that value for  $\lambda$ .

For each of the successive 2000 values of  $\lambda$  in each lasso regression below, the mean and standard error of the associated least squared errors is plotted (red points with grey error bars). As the lasso penalty ( $\lambda$ ) is increased, individual regression coefficients become insignificantly different from 0, so that the number of significant coefficients (variables) remaining in the regression becomes smaller. The number of significant coefficients remaining in the regression as  $\lambda$  increases is printed along the top of the plot. The  $\lambda$  at which the best set of coefficients was found ( $\lambda_{\min}$ , producing the smallest error) is indicated by the left-hand, vertical dashed line on each plot. The right-hand vertical dashed line identifies the highest value of  $\lambda$  (smallest set of regression variables/coefficients) at which the mean squared error is within one standard error of the minimum. Accepted usage when there are many explanatory variables is that this value of  $\lambda$  ("Lambda min + 1 SEM") identifies the smallest set of regression coefficients that satisfactorily fit the data. These regression coefficients are returned as the result, with "." indicating those coefficients that became zero in the regression.

### Supplementary lasso regression 1. Basal OCR dependence on AMPK,TORC1, CGG, genetic group, age and gender.

Lasso regression and variable selection with glmnet:

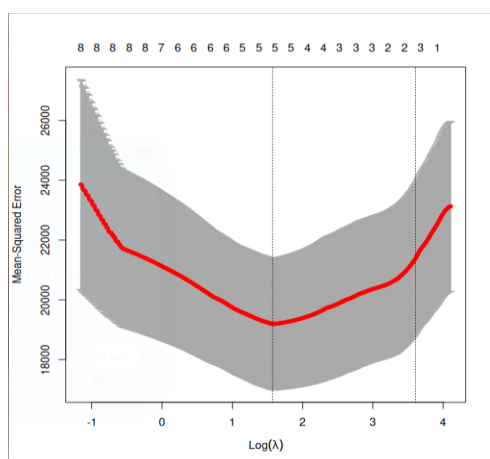

```
[1] "Lambda min + 1 SEM:"
```

```
12 x 1 sparse Matrix of class "dgCMatrix"
```

|                    |           |
|--------------------|-----------|
| (Intercept)        | 399.60558 |
| Gender.code        | 52.74094  |
| Gender.PM          | .         |
| Genetic.Group.code | .         |
| Log.AMPK           | 38.92451  |
| log.AMPK.PM        | .         |
| Log.CGG            | .         |
| Log.CGG.PM         | .         |
| log.Patient.age    | .         |
| log.Patient.age.PM | .         |
| Log.TORC1.activity | .         |
| LogTORC1.PM.slope  | .         |

## Supplementary lasso regression 2. ATP synthesis OCR dependence on AMPK,TORC1, CGG, genetic group, age and gender.

### 1. Lasso regression and variable selection with glmnet:

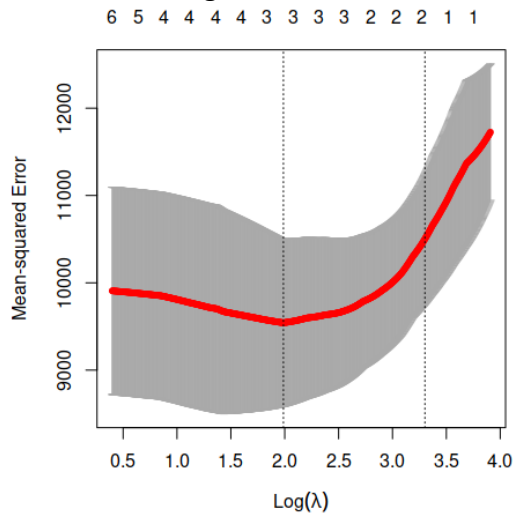

```
[1] "Lambda min + 1 SEM:"
```

```
[[4]]
```

```
12 x 1 sparse Matrix of class  
"dgCMatrix"
```

|                    |           |
|--------------------|-----------|
| (Intercept)        | 260.56036 |
| Gender.code        | 50.95329  |
| Gender.PM          | .         |
| Genetic.Group.Code | .         |
| Log.AMPK.          | 22.56895  |
| log.AMPK.PM.Slope  | .         |
| Log.CGG.           | .         |
| Log.CGG..PM.slope  | .         |
| log.Patient.age    | .         |
| log.Patient.age.PM | .         |
| Log.TORC1.activity | .         |
| LogTORC1.PM.slope  | .         |

## Supplementary lasso regression 3. Proton leak dependence on AMPK,TORC1, CGG, genetic group, age and gender

### Lasso regression and variable selection with glmnet:

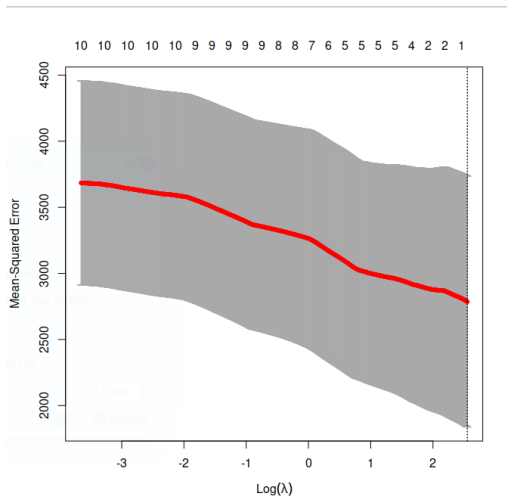

```
[1] "Lambda min + 1 SEM:"
```

```
12 x 1 sparse Matrix of class  
"dgCMatrix"
```

|                    |          |
|--------------------|----------|
| (Intercept)        | 65.13311 |
| Gender.code        | .        |
| Gender.PM          | .        |
| Genetic.Group.code | .        |
| Log.AMPK           | .        |
| Log.AMPK.PM        | .        |
| Log.CGG            | .        |
| Log.CGG.PM         | .        |
| Log.Patient.age    | .        |
| Log.Patient.age.PM | .        |
| Log.TORC1.activity | .        |
| LogTORC1.PM        | .        |

Note: In this regression the smallest mean squared error was found with only the intercept term remaining in the regression ie. inclusion of none of the tested explanatory variables improved the fit to the data.

## Supplementary lasso regression 4. Nonmitochondrial OCR dependence on AMPK, CGG, TORC1, genetic group, age and gender.

### 1. Lasso regression and variable selection with glmnet:

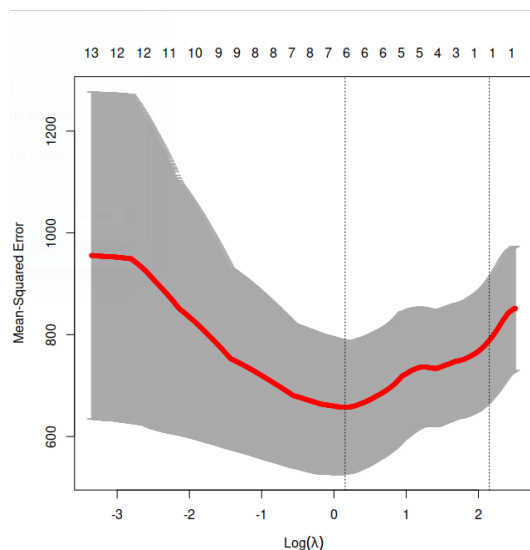

[1] "Lambda min + 1 SEM:"

14 x 1 sparse Matrix of class  
"dgCMatrix"

|                       |           |
|-----------------------|-----------|
| (Intercept)           | 76.26808  |
| Gender.code           | .         |
| Gender.PM             | .         |
| Genetic.Group.Code    | .         |
| Log.AMPK.             | .         |
| log.AMPK.PM           | .         |
| Log.ATP.steady.state. | .         |
| Log.ATPsteady.PM      | .         |
| Log.CGG               | .         |
| Log.CGG.PM            | .         |
| Log.Patient.age       | .         |
| Log.Patient.age.PM    | .         |
| Log.TORC1.activity    | -24.66397 |
| LogTORC1.PM           | .         |

## Supplementary lasso regression 5. AMPK activity dependence on TORC1, CGG expansion size, ATP steady state levels, genetic group, age and gender.

Lasso regression and variable selection with glmnet:

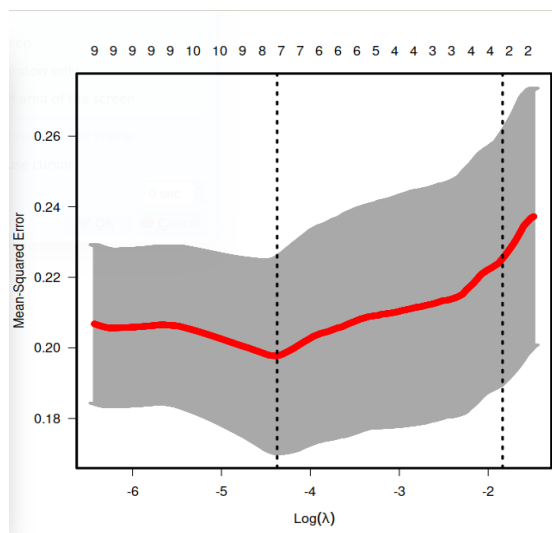

[1] "Lambda min + 1 SEM:"

12 x 1 sparse Matrix of class  
"dgCMatrix"

|                      |            |
|----------------------|------------|
| (Intercept)          | 1.1498179  |
| Gender.code          | .          |
| Gender.PM            | .          |
| Genetic.Group.Code   | 0.0801799  |
| Log.ATP.steady.state | .          |
| Log.ATPsteady.PM     | .          |
| Log.CGG              | .          |
| Log.CGG.PM           | .          |
| Log.Patient.age      | .          |
| Log.Patient.age.PM   | .          |
| Log.TORC1.activity   | .          |
| LogTORC1.PM.slope    | -0.1713293 |

# Supplementary lasso regression 6. TORC1 activity dependence on AMPK, CGG, ATP levels, genetic group, age and gender

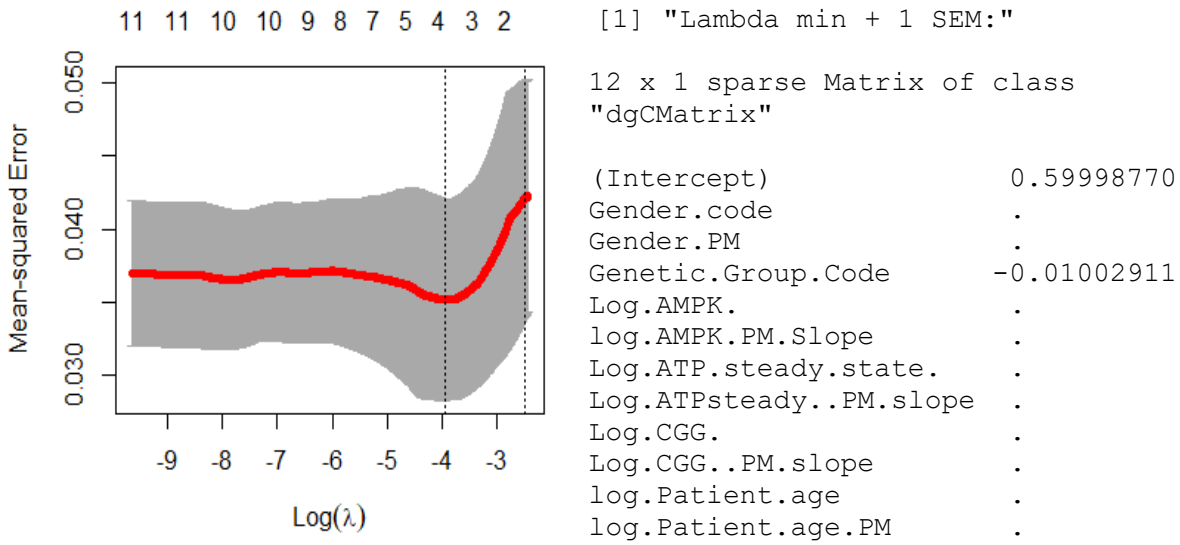

## Supplementary lasso regression 7. Lasso multivariate regression of AMPK and TORC1 activities against CGG expansion size.

For this regression, two dependent (Y) variables were used : AMPK and TORC1 activities. The X variables were the genetic group code (allowing the intercepts to differ for the PM group), the log of the CGG expansion size (slope term for the log-linear regression) and a dummy variable allowing the slope of the regression line to differ for the PM and control groups. In addition to the plot of mean squared error against  $\text{Log}(\lambda)$ , plots of the observed *versus* the predicted Y values, as well as the data points with the calculated best fitting regression lines are shown (*ie.* at the  $\lambda$  value that minimizes the mean square error).

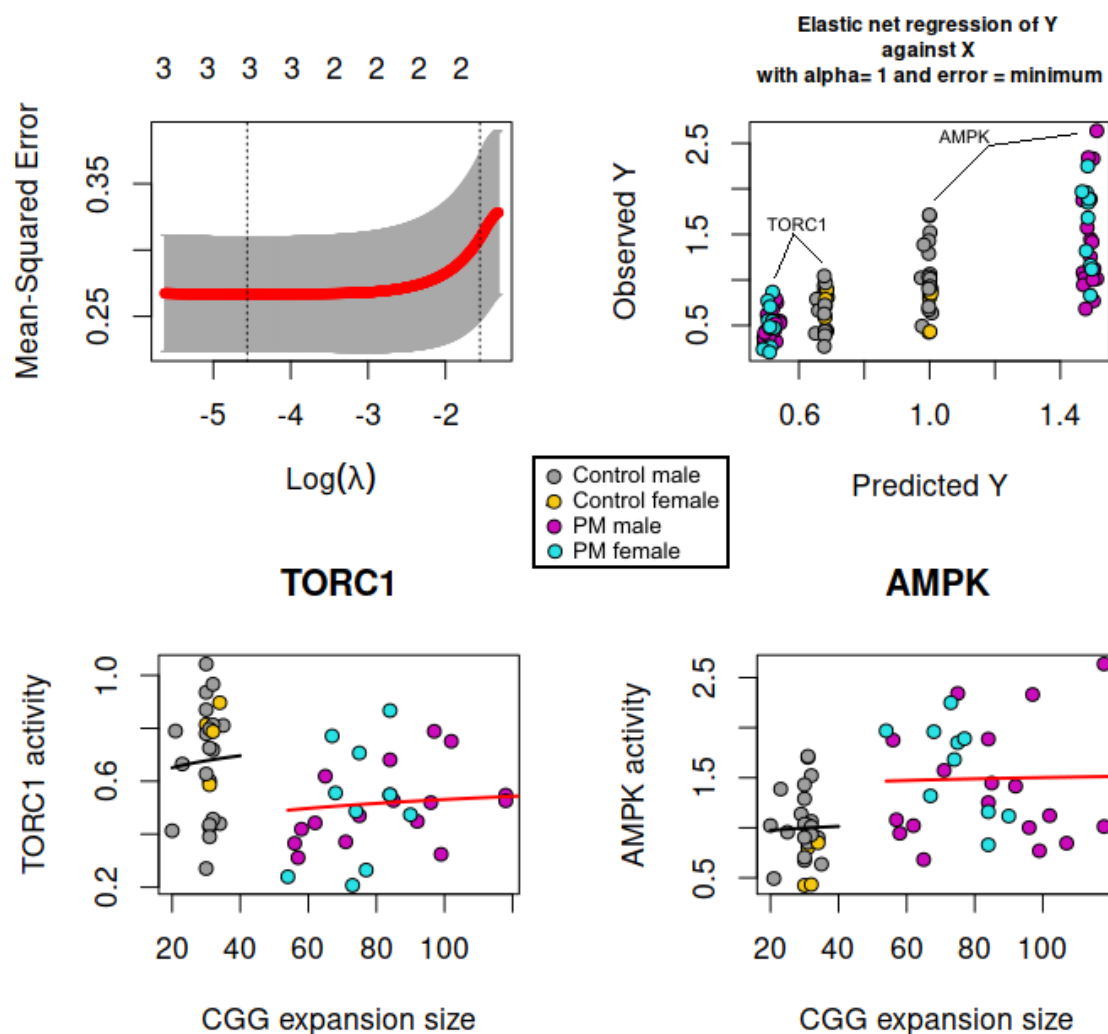

Lasso regression and variable selection with glmnet:

```
$TORC1.activity
4 x 1 sparse Matrix of class "dgCMatrix"

(Intercept)      0.4544675
Genetic.Group.Code -0.2254402
Log.CGG.         0.1509363
Log.CGG..PM.slope .
```

```
$AMPK.activity
4 x 1 sparse Matrix of class "dgCMatrix"

(Intercept)      0.8016975
Genetic.Group.Code 0.4352640
Log.CGG.         0.1324907
Log.CGG..PM.slope .
```

## Supplementary lasso regression 8. ATP steady state level dependence on AMPK, TORC1, CGG, ATP synthesis OCR, nonmitochondrial OCR, basal OCR, genetic group, age and gender.

Lasso regression and variable selection with glmnet:

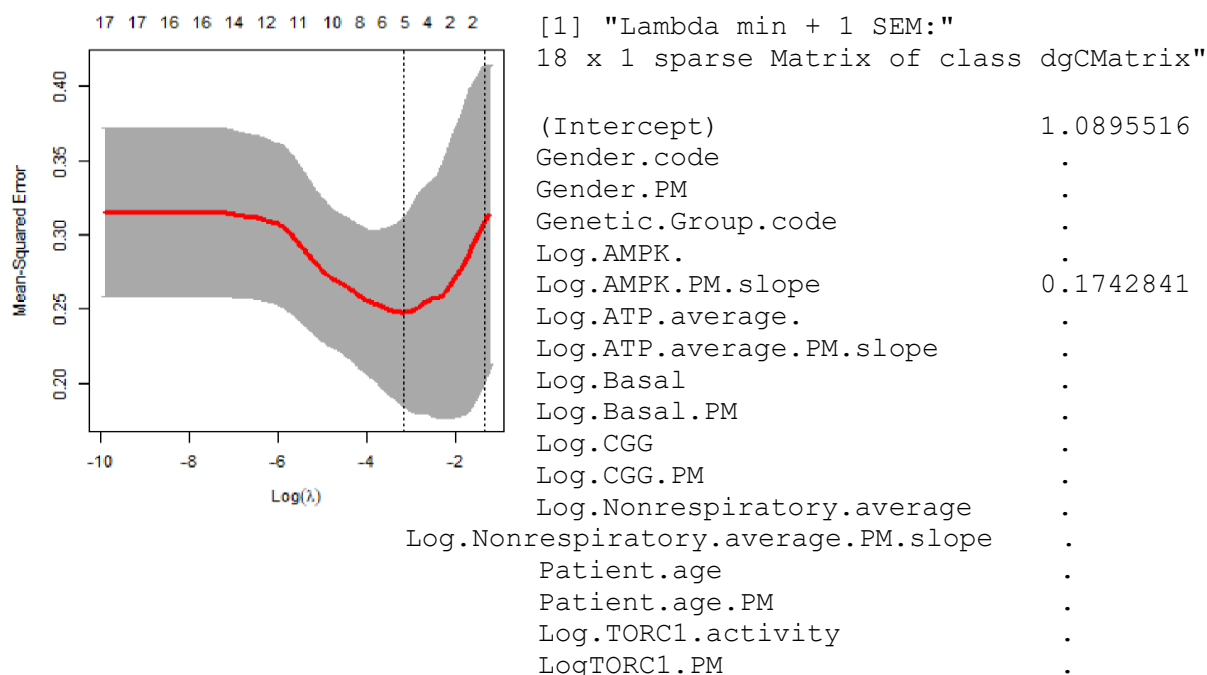

## Supplementary lasso regression 9. ROS dependence on AMPK, TORC1, CGG, basal OCR, genetic group, age and gender.

Lasso regression and variable selection with glmnet:

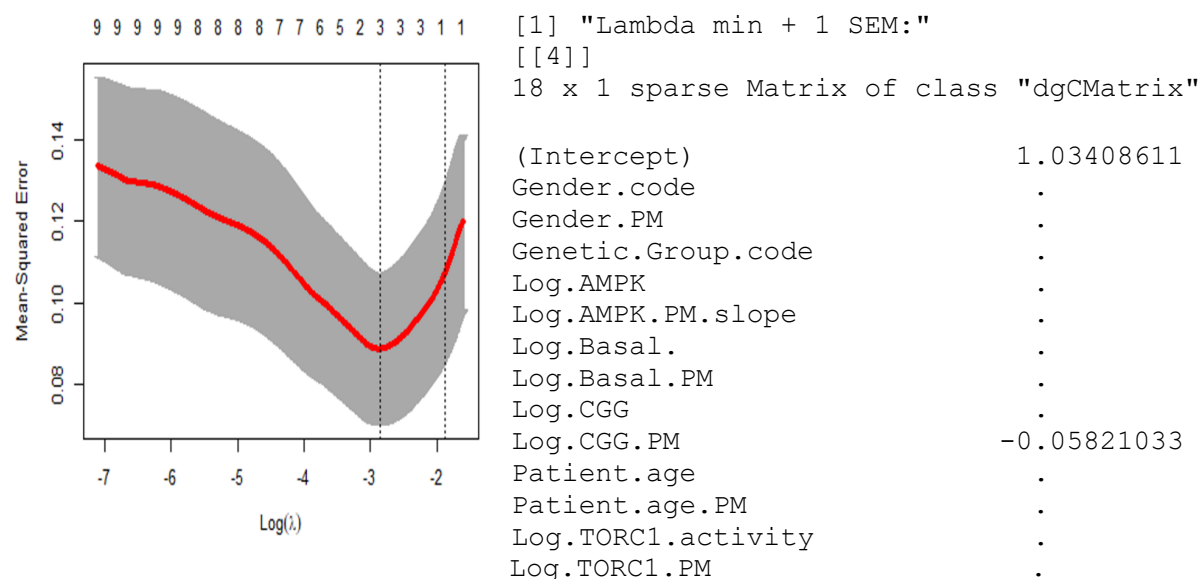

Supplement: s1 [file s1]
